# Supplementary material for: The Blood Gene Expression Signature for Kawasaki Disease in Children Identified with Advanced Feature Selection Methods
Source: Hindawi journal article supplement (doi:10.1155/2020/6062436), 2020-01-01
Supplement: f1 [file 6062436.f1.pdf]

| Rank | Gene      | Relative Importance |
|------|-----------|---------------------|
| 1    | NAG18     | 0.36000308          |
| 2    | C19orf31  | 0.3523193           |
| 3    | TMSB4X    | 0.35129923          |
| 4    | UBC       | 0.3473719           |
| 5    | ORC6L     | 0.33218265          |
| 6    | SHC1      | 0.33168957          |
| 7    | IMAA      | 0.31012365          |
| 8    | PDE4C     | 0.29936185          |
| 9    | GGA1      | 0.2884386           |
| 10   | LOC643509 | 0.28700924          |
| 11   | ITIH5     | 0.28060415          |
| 12   | SLC44A4   | 0.27057645          |
| 13   | ARPC2     | 0.25027302          |
| 14   | UNC45A    | 0.24592486          |
| 15   | C21orf55  | 0.23184118          |
| 16   | GNAS      | 0.22336727          |
| 17   | AIRE      | 0.22249596          |
| 18   | AKR1D1    | 0.22170645          |
| 19   | IFI27     | 0.21943754          |
| 20   | C21orf24  | 0.2133718           |
| 21   | HP        | 0.20034078          |
| 22   | PSMD12    | 0.1986508           |
| 23   | STK24     | 0.1945225           |
| 24   | LOC389517 | 0.1934089           |
| 25   | CLUAP1    | 0.18326026          |
| 26   | SLC25A3   | 0.17765063          |
| 27   | LOC642947 | 0.17544626          |
| 28   | CDAN1     | 0.1738169           |
| 29   | GJC1      | 0.17201358          |
| 30   | SHCBP1    | 0.16924067          |
| 31   | CLTB      | 0.16489618          |
| 32   | SERPINB6  | 0.16406159          |
| 33   | GPX1      | 0.16340104          |
| 34   | GPR84     | 0.15685973          |
| 35   | GYG1      | 0.15558413          |
| 36   | FTHL7     | 0.15443394          |
| 37   | DCTN3     | 0.15443048          |
| 38   | SLC16A12  | 0.15199228          |
| 39   | SPOP      | 0.14969622          |
| 40   | C3orf60   | 0.14728656          |
| 41   | RNF34     | 0.14381029          |
| 42   | PTPN6     | 0.14245895          |
| 43   | C19orf59  | 0.1424459           |

---

|    |           |             |
|----|-----------|-------------|
| 44 | SEC24C    | 0.1422294   |
| 45 | LOC653086 | 0.14027531  |
| 46 | MEF2D     | 0.14002062  |
| 47 | BSG       | 0.13842101  |
| 48 | REPIN1    | 0.13461603  |
| 49 | MGC16703  | 0.13395126  |
| 50 | C21orf7   | 0.13240428  |
| 51 | OPLAH     | 0.1320285   |
| 52 | SDHALP1   | 0.12590906  |
| 53 | HPCAL1    | 0.12447115  |
| 54 | TRMT5     | 0.123148166 |
| 55 | RNF7      | 0.121042304 |
| 56 | BAX       | 0.121017456 |
| 57 | SETD3     | 0.12072239  |
| 58 | BAT1      | 0.11960507  |
| 59 | TSPO      | 0.119106606 |
| 60 | ATP5G2    | 0.11906991  |
| 61 | LOC348840 | 0.11737968  |
| 62 | HK1       | 0.11501848  |
| 63 | PDGFC     | 0.11370359  |
| 64 | KCTD14    | 0.113638535 |
| 65 | LY6E      | 0.11203363  |
| 66 | OTOF      | 0.1119267   |
| 67 | HIST2H2AC | 0.111916855 |
| 68 | UBE2I     | 0.11154278  |
| 69 | IGLL1     | 0.111129664 |
| 70 | DBP       | 0.11064012  |
| 71 | ETFB      | 0.108941466 |
| 72 | GAK       | 0.108040236 |
| 73 | IFI44L    | 0.10718108  |
| 74 | DACH1     | 0.107014544 |
| 75 | NIPA2     | 0.10655466  |
| 76 | RAB32     | 0.10434535  |
| 77 | ARHGEF7   | 0.103304826 |
| 78 | NOV       | 0.10299446  |
| 79 | KCNH6     | 0.10264436  |
| 80 | ADAM19    | 0.10218227  |
| 81 | METTL7B   | 0.0988765   |
| 82 | OAS1      | 0.09824749  |
| 83 | SMPDL3A   | 0.09812359  |
| 84 | SIGLEC1   | 0.097839795 |
| 85 | AXL       | 0.096493274 |
| 86 | C11orf82  | 0.09599785  |
| 87 | CBX7      | 0.093002334 |

---

---

|     |            |             |
|-----|------------|-------------|
| 88  | FBXO18     | 0.09274768  |
| 89  | UBE1       | 0.091729194 |
| 90  | CETP       | 0.0902334   |
| 91  | RETN       | 0.09000583  |
| 92  | TDRD9      | 0.08988873  |
| 93  | ZGPAT      | 0.08756204  |
| 94  | LAIR1      | 0.087546796 |
| 95  | LOC440731  | 0.086878896 |
| 96  | CD177      | 0.086783536 |
| 97  | SNRPD2     | 0.086659566 |
| 98  | RALGDS     | 0.08628216  |
| 99  | ZNF683     | 0.086189166 |
| 100 | CMTM2      | 0.08575817  |
| 101 | BRD9       | 0.08574692  |
| 102 | ZNF93      | 0.08178329  |
| 103 | LOC388524  | 0.08017059  |
| 104 | GAS7       | 0.07972901  |
| 105 | S100A9     | 0.07755867  |
| 106 | FKTN       | 0.07747077  |
| 107 | ARG1       | 0.073877275 |
| 108 | NRCAM      | 0.07322396  |
| 109 | OAS2       | 0.072644256 |
| 110 | TRPT1      | 0.07261585  |
| 111 | ATL3       | 0.072215825 |
| 112 | IGF2BP3    | 0.07206646  |
| 113 | VPS16      | 0.071506806 |
| 114 | ATP9A      | 0.07123237  |
| 115 | KIAA1715   | 0.07103308  |
| 116 | GOLGA7     | 0.07089891  |
| 117 | TTN        | 0.06993392  |
| 118 | ZNF682     | 0.06962261  |
| 119 | IFI44      | 0.06910725  |
| 120 | LAP3       | 0.06888484  |
| 121 | FBXW2      | 0.06858472  |
| 122 | EPSTI1     | 0.067888916 |
| 123 | IRAK3      | 0.067868665 |
| 124 | PQBP1      | 0.06613518  |
| 125 | IFIT1      | 0.06607831  |
| 126 | RPL8       | 0.065098025 |
| 127 | CLEC5A     | 0.06485633  |
| 128 | CDKN2AIPNL | 0.06479295  |
| 129 | C1QB       | 0.064703956 |
| 130 | XAF1       | 0.06433807  |
| 131 | SLC25A40   | 0.064074226 |

---

---

|     |            |             |
|-----|------------|-------------|
| 132 | PPM1G      | 0.063343875 |
| 133 | S100A4     | 0.062042013 |
| 134 | MYL6       | 0.060847137 |
| 135 | EIF6       | 0.06046572  |
| 136 | FCGR1A     | 0.060414094 |
| 137 | ANXA3      | 0.06001897  |
| 138 | EIF3EIP    | 0.05935297  |
| 139 | ANKRD22    | 0.058531307 |
| 140 | RSAD2      | 0.05846795  |
| 141 | SASH1      | 0.05812941  |
| 142 | RAB36      | 0.058035623 |
| 143 | SERPINB8   | 0.057630725 |
| 144 | LOC26010   | 0.057589702 |
| 145 | CMPK2      | 0.05750871  |
| 146 | SLC4A5     | 0.05742742  |
| 147 | CNOT1      | 0.057288013 |
| 148 | GPR68      | 0.056929003 |
| 149 | ALOX5      | 0.05672244  |
| 150 | SLC2A3     | 0.056622308 |
| 151 | PECR       | 0.05610668  |
| 152 | IFI6       | 0.056087203 |
| 153 | TMCO3      | 0.055846985 |
| 154 | KREMEN1    | 0.05581532  |
| 155 | ZDHHC19    | 0.055333257 |
| 156 | EXOC7      | 0.055151504 |
| 157 | SERPINB2   | 0.054429106 |
| 158 | FCER1A     | 0.054373633 |
| 159 | CCNDBP1    | 0.054334566 |
| 160 | S100A12    | 0.05378089  |
| 161 | IFIT3      | 0.053605434 |
| 162 | SDHC       | 0.052901067 |
| 163 | OMG        | 0.052420404 |
| 164 | KIF3C      | 0.052370567 |
| 165 | OAS3       | 0.05196094  |
| 166 | PARP12     | 0.051566053 |
| 167 | PARP9      | 0.05136812  |
| 168 | LTA4H      | 0.051184792 |
| 169 | GSTO1      | 0.05102667  |
| 170 | HIST2H2AA3 | 0.050872713 |
| 171 | TSPAN2     | 0.05064133  |
| 172 | FLJ40142   | 0.05053511  |
| 173 | PYGL       | 0.050156865 |
| 174 | UBE2D3     | 0.049754173 |
| 175 | IFIT2      | 0.049716905 |

---

---

|     |          |             |
|-----|----------|-------------|
| 176 | PGS1     | 0.04952723  |
| 177 | OSTalpha | 0.049272887 |
| 178 | HERC6    | 0.04918275  |
| 179 | PAPSS1   | 0.0491819   |
| 180 | IFIH1    | 0.04864303  |
| 181 | DDX60    | 0.048078366 |
| 182 | EIF4G1   | 0.048073087 |
| 183 | SLC26A8  | 0.048071604 |
| 184 | CS       | 0.048036903 |
| 185 | CACNA1E  | 0.04798284  |
| 186 | MX1      | 0.047832467 |
| 187 | EIF2AK2  | 0.04756019  |
| 188 | HSD3B7   | 0.04741451  |
| 189 | PRDX5    | 0.047298238 |
| 190 | EBI3     | 0.046638787 |
| 191 | PHACTR4  | 0.046597432 |
| 192 | DGUOK    | 0.046274602 |
| 193 | IFITM3   | 0.045938693 |
| 194 | P2RY14   | 0.04571856  |
| 195 | SPCS2    | 0.04562912  |
| 196 | FBXW11   | 0.04526848  |
| 197 | IL8RBP   | 0.04501242  |
| 198 | TSPAN32  | 0.04475396  |
| 199 | CD44     | 0.044386595 |
| 200 | IRF1     | 0.044127077 |
| 201 | KIAA0101 | 0.043876085 |
| 202 | NARF     | 0.04384761  |
| 203 | ISG15    | 0.043664597 |
| 204 | LMNB1    | 0.04334844  |
| 205 | JUP      | 0.04292621  |
| 206 | CACNG6   | 0.042668294 |
| 207 | KIAA1160 | 0.04246677  |
| 208 | SCARB2   | 0.042229626 |
| 209 | TMEM16K  | 0.04210661  |
| 210 | TCTN1    | 0.041925825 |
| 211 | C14orf24 | 0.04183002  |
| 212 | HERC5    | 0.04143305  |
| 213 | IL1R2    | 0.041266758 |
| 214 | MMD      | 0.041259322 |
| 215 | ANAPC11  | 0.04124464  |
| 216 | FYN      | 0.041107263 |
| 217 | TLR7     | 0.040889826 |
| 218 | CDC45L   | 0.040885188 |
| 219 | IRF9     | 0.04081344  |

---

---

|     |           |             |
|-----|-----------|-------------|
| 220 | FCGR1B    | 0.040668793 |
| 221 | LOC728744 | 0.040385537 |
| 222 | CDK5RAP2  | 0.040112764 |
| 223 | AGTPBP1   | 0.040101286 |
| 224 | BPI       | 0.040086    |
| 225 | PKM2      | 0.040026613 |
| 226 | C5orf20   | 0.039875235 |
| 227 | CERK      | 0.03957352  |
| 228 | RCP9      | 0.039536376 |
| 229 | DHRS7     | 0.039242722 |
| 230 | ARID1A    | 0.039190896 |
| 231 | KLHL22    | 0.03889985  |
| 232 | SAPS2     | 0.0388262   |
| 233 | SIGLEC9   | 0.038496323 |
| 234 | CD163     | 0.038401812 |
| 235 | HCFC1R1   | 0.03839096  |
| 236 | ZDHHC16   | 0.038269605 |
| 237 | SDPR      | 0.038172346 |
| 238 | Septin.4  | 0.038076635 |
| 239 | CBARA1    | 0.038003325 |
| 240 | HIST1H2BD | 0.037916653 |
| 241 | NEXN      | 0.037851162 |
| 242 | MMP8      | 0.037637953 |
| 243 | VNN1      | 0.037182435 |
| 244 | C1QC      | 0.03709862  |
| 245 | CMTM1     | 0.037069988 |
| 246 | MLSTD1    | 0.036816534 |
| 247 | F2R       | 0.03665748  |
| 248 | H2AFJ     | 0.03661465  |
| 249 | FAM101B   | 0.03633061  |
| 250 | PLSCR1    | 0.035979547 |
| 251 | LOC728441 | 0.0357906   |
| 252 | PLP2      | 0.035742246 |
| 253 | SAMD9L    | 0.03563979  |
| 254 | CCL8      | 0.035568275 |
| 255 | ORAI2     | 0.03551344  |
| 256 | LOC653559 | 0.035476644 |
| 257 | MSH3      | 0.03540973  |
| 258 | FAM20A    | 0.035292216 |
| 259 | CA4       | 0.035242576 |
| 260 | C20orf3   | 0.035205614 |
| 261 | C14orf159 | 0.035145827 |
| 262 | S100P     | 0.035079915 |
| 263 | CCR3      | 0.035034046 |

---

---

|     |           |             |
|-----|-----------|-------------|
| 264 | UPP1      | 0.034975    |
| 265 | GPR141    | 0.034788582 |
| 266 | PSMB8     | 0.034709852 |
| 267 | CD86      | 0.034673624 |
| 268 | PRTN3     | 0.034537785 |
| 269 | ITGB1     | 0.03428868  |
| 270 | MPO       | 0.034207653 |
| 271 | OIP5      | 0.034120988 |
| 272 | RPS6KA5   | 0.034102175 |
| 273 | HLA.DPA1  | 0.034094654 |
| 274 | MGST1     | 0.034066692 |
| 275 | FLJ22662  | 0.034025516 |
| 276 | TLR5      | 0.033981156 |
| 277 | RGL4      | 0.03383904  |
| 278 | LACTB     | 0.033714093 |
| 279 | MT1G      | 0.03371337  |
| 280 | NSL1      | 0.033321723 |
| 281 | BATF      | 0.033241685 |
| 282 | TP53I3    | 0.033119198 |
| 283 | PSMB9     | 0.033075266 |
| 284 | CDCA5     | 0.032887366 |
| 285 | TSC22D1   | 0.032678824 |
| 286 | H1FO      | 0.03254214  |
| 287 | C10orf33  | 0.032509536 |
| 288 | HHEX      | 0.032507274 |
| 289 | MGC10997  | 0.032076325 |
| 290 | GALNT14   | 0.031892877 |
| 291 | IER3      | 0.031679064 |
| 292 | GLTSCR2   | 0.031581916 |
| 293 | CCDC109A  | 0.031521752 |
| 294 | DRAM      | 0.031505045 |
| 295 | BLOC1S1   | 0.031479836 |
| 296 | TCN2      | 0.03145601  |
| 297 | PRSS33    | 0.03144762  |
| 298 | PLA2G4B   | 0.03137265  |
| 299 | SRPK1     | 0.031351607 |
| 300 | MPZL2     | 0.031233622 |
| 301 | THBS3     | 0.031097477 |
| 302 | EMR4      | 0.031070545 |
| 303 | PGRMC1    | 0.03103493  |
| 304 | LYSMD2    | 0.030973768 |
| 305 | PRAM1     | 0.030967968 |
| 306 | LOC389816 | 0.03091637  |
| 307 | CLC       | 0.030880367 |

---

---

|     |           |             |
|-----|-----------|-------------|
| 308 | IRF7      | 0.030707663 |
| 309 | COL17A1   | 0.030538576 |
| 310 | ZNF137    | 0.030521601 |
| 311 | E2F2      | 0.03049022  |
| 312 | HIST2H2BE | 0.03045658  |
| 313 | NLRP1     | 0.030358952 |
| 314 | IL18R1    | 0.030356418 |
| 315 | SLC31A1   | 0.030258885 |
| 316 | PID1      | 0.030247077 |
| 317 | IL18BP    | 0.03011915  |
| 318 | SLC35A2   | 0.030115383 |
| 319 | NCALD     | 0.029813858 |
| 320 | C3AR1     | 0.029741887 |
| 321 | GBP1      | 0.029734308 |
| 322 | OASL      | 0.029708428 |
| 323 | EMR2      | 0.029691834 |
| 324 | SIGLEC10  | 0.029690385 |
| 325 | LRPAP1    | 0.02967732  |
| 326 | TGFBR2    | 0.029576197 |
| 327 | EMR3      | 0.029517708 |
| 328 | PSMD4     | 0.029485539 |
| 329 | ADORA2A   | 0.029425591 |
| 330 | CCPG1     | 0.029344184 |
| 331 | NCR3      | 0.029272322 |
| 332 | CACNA2D3  | 0.029246345 |
| 333 | TOP2A     | 0.029242111 |
| 334 | KCNG1     | 0.029209536 |
| 335 | SEPHS2    | 0.029182533 |
| 336 | RAC1      | 0.029155375 |
| 337 | ZBTB4     | 0.029132035 |
| 338 | OLFM4     | 0.02911899  |
| 339 | BMX       | 0.029091803 |
| 340 | PTAFR     | 0.029088318 |
| 341 | STAT1     | 0.029047672 |
| 342 | C5orf32   | 0.028895138 |
| 343 | SIGLECP3  | 0.028879438 |
| 344 | UPB1      | 0.028376482 |
| 345 | WSB2      | 0.028249376 |
| 346 | KIAA0232  | 0.0281506   |
| 347 | GGTLC2    | 0.02812858  |
| 348 | CECR1     | 0.02812028  |
| 349 | UBE2L6    | 0.028068477 |
| 350 | CCNA2     | 0.0280577   |
| 351 | MS4A4A    | 0.02802227  |

---



---

|     |           |             |
|-----|-----------|-------------|
| 352 | C15orf52  | 0.027944464 |
| 353 | SAT1      | 0.027867937 |
| 354 | PSCD1     | 0.027861869 |
| 355 | ZBTB40    | 0.027806828 |
| 356 | LTB4DH    | 0.027765336 |
| 357 | MOBK12C   | 0.027673133 |
| 358 | SPG7      | 0.027668742 |
| 359 | MLLT6     | 0.02755398  |
| 360 | DCTN2     | 0.027541725 |
| 361 | ZBP1      | 0.027502295 |
| 362 | GRB10     | 0.027416307 |
| 363 | BAMBI     | 0.027353311 |
| 364 | NDRG2     | 0.027271764 |
| 365 | PACSIN1   | 0.027198061 |
| 366 | BTN3A1    | 0.027136222 |
| 367 | PRMT1     | 0.027122578 |
| 368 | NSF       | 0.027054587 |
| 369 | GINS2     | 0.02685083  |
| 370 | STAMBP    | 0.026813498 |
| 371 | LGALS3BP  | 0.026758075 |
| 372 | LOH11CR2A | 0.026719376 |
| 373 | MXD4      | 0.026660439 |
| 374 | LCN2      | 0.026637275 |
| 375 | HSPBAP1   | 0.0265069   |
| 376 | LOC728888 | 0.026506526 |
| 377 | AMPH      | 0.026485957 |
| 378 | NUSAP1    | 0.026440397 |
| 379 | QRICH1    | 0.026361642 |
| 380 | LGALS1    | 0.026347285 |
| 381 | SLC26A11  | 0.026259165 |
| 382 | ROGDI     | 0.026216175 |
| 383 | SLC28A3   | 0.026120897 |
| 384 | FCRL3     | 0.026109297 |
| 385 | MAFB      | 0.025990954 |
| 386 | GNG11     | 0.025919583 |
| 387 | FLJ14213  | 0.025898416 |
| 388 | KCNE1     | 0.02579158  |
| 389 | UHRF1     | 0.025766678 |
| 390 | P2RY8     | 0.025692089 |
| 391 | DHX58     | 0.025647523 |
| 392 | PLA2G7    | 0.025603427 |
| 393 | ULK1      | 0.025590014 |
| 394 | CTSD      | 0.025573341 |
| 395 | SMARCD3   | 0.025505623 |

---

---

|     |           |             |
|-----|-----------|-------------|
| 396 | SELM      | 0.025504442 |
| 397 | TYSND1    | 0.025468757 |
| 398 | RAB37     | 0.025436476 |
| 399 | LSM12     | 0.025390042 |
| 400 | TPM4      | 0.025360866 |
| 401 | GPBAR1    | 0.02526577  |
| 402 | CUL1      | 0.025257826 |
| 403 | HESX1     | 0.025162661 |
| 404 | HSH2D     | 0.02511207  |
| 405 | PLAC8     | 0.025100749 |
| 406 | NDFIP2    | 0.0250864   |
| 407 | EDNRB     | 0.025080856 |
| 408 | CDC25B    | 0.025075257 |
| 409 | VNN2      | 0.024867853 |
| 410 | IL10RA    | 0.024832418 |
| 411 | DPEP2     | 0.024824485 |
| 412 | SIRPA     | 0.0247768   |
| 413 | SQRDL     | 0.02476799  |
| 414 | NLRC4     | 0.02475926  |
| 415 | MGC29891  | 0.024746414 |
| 416 | OGDH      | 0.024651393 |
| 417 | CD63      | 0.024599146 |
| 418 | MAN2B1    | 0.024592722 |
| 419 | FGD2      | 0.024556074 |
| 420 | PHF15     | 0.024533138 |
| 421 | ADORA2B   | 0.024493862 |
| 422 | FAM89A    | 0.024468986 |
| 423 | LDHA      | 0.024371512 |
| 424 | PDE4B     | 0.02436791  |
| 425 | LOC130074 | 0.024326416 |
| 426 | BAG5      | 0.02430322  |
| 427 | RTN1      | 0.024294546 |
| 428 | HDC       | 0.024256615 |
| 429 | CLDN23    | 0.024244353 |
| 430 | SP110     | 0.02421337  |
| 431 | BACE2     | 0.024177311 |
| 432 | IFI35     | 0.024171788 |
| 433 | ACRBP     | 0.024105852 |
| 434 | CKAP2L    | 0.024044825 |
| 435 | CREB5     | 0.02399869  |
| 436 | UBE2C     | 0.023960182 |
| 437 | RAE1      | 0.023900956 |
| 438 | CEACAM6   | 0.02387171  |
| 439 | OLIG2     | 0.023705333 |

---

---

|     |           |             |
|-----|-----------|-------------|
| 440 | C9orf103  | 0.023701884 |
| 441 | LAMP3     | 0.023656545 |
| 442 | PTP4A3    | 0.023652451 |
| 443 | EMR1      | 0.023595864 |
| 444 | STAT2     | 0.02358888  |
| 445 | GIMAP8    | 0.0235688   |
| 446 | EEF1G     | 0.023494313 |
| 447 | RUNX1     | 0.023392284 |
| 448 | LOC648984 | 0.023344677 |
| 449 | SULF2     | 0.023344545 |
| 450 | CCNY      | 0.023247374 |
| 451 | NQO2      | 0.023225736 |
| 452 | TNK2      | 0.023212634 |
| 453 | ADHFE1    | 0.023201043 |
| 454 | LST1      | 0.023191262 |
| 455 | GPSM2     | 0.023146255 |
| 456 | MGAM      | 0.02313107  |
| 457 | TYMS      | 0.023127886 |
| 458 | METTL9    | 0.023119207 |
| 459 | EDG4      | 0.02309999  |
| 460 | RBBP6     | 0.023069656 |
| 461 | FOXO3     | 0.022980511 |
| 462 | ALOX15    | 0.022891793 |
| 463 | SYT11     | 0.022874562 |
| 464 | SH2D1B    | 0.022748875 |
| 465 | CDK9      | 0.022735093 |
| 466 | RASSF2    | 0.022714538 |
| 467 | BCKDHA    | 0.022696938 |
| 468 | C10orf10  | 0.02266069  |
| 469 | CYB5R1    | 0.02260699  |
| 470 | MAPK1     | 0.022584261 |
| 471 | RIN2      | 0.022571808 |
| 472 | RARA      | 0.022565318 |
| 473 | MTHFD2    | 0.022561872 |
| 474 | IFITM1    | 0.022504993 |
| 475 | ADM       | 0.022462646 |
| 476 | RHOC      | 0.022443818 |
| 477 | CCDC56    | 0.022439562 |
| 478 | LAPTM4B   | 0.02239458  |
| 479 | DBNDD1    | 0.022388348 |
| 480 | DEFA1     | 0.022380149 |
| 481 | PHF1      | 0.022316735 |
| 482 | ZNF185    | 0.022307046 |
| 483 | CST7      | 0.02229904  |

---

---

|     |           |             |
|-----|-----------|-------------|
| 484 | MMP9      | 0.02222009  |
| 485 | NAPRT1    | 0.022210669 |
| 486 | HIST1H2BK | 0.022202134 |
| 487 | C20orf160 | 0.022178745 |
| 488 | GAS6      | 0.022155203 |
| 489 | HBXIP     | 0.022142716 |
| 490 | C2orf18   | 0.022016643 |
| 491 | KIAA0241  | 0.022001315 |
| 492 | S100A8    | 0.021984177 |
| 493 | IFNAR2    | 0.021941833 |
| 494 | FOLR3     | 0.021935163 |
| 495 | ELA2      | 0.021843072 |
| 496 | LOC388969 | 0.021834154 |
| 497 | DERA      | 0.021804798 |
| 498 | CCL23     | 0.021798918 |
| 499 | CYB5D2    | 0.021784848 |
| 500 | GLS       | 0.021780184 |
| 501 | TRAF1     | 0.02173578  |
| 502 | MT1A      | 0.021666951 |
| 503 | MED24     | 0.021650983 |
| 504 | RNASE2    | 0.021634838 |
| 505 | ALDH1A1   | 0.021608798 |
| 506 | BMP6      | 0.021588076 |
| 507 | ODC1      | 0.021530231 |
| 508 | PLOD2     | 0.02151555  |
| 509 | PLEKHA2   | 0.021472314 |
| 510 | CDKN1A    | 0.021460438 |
| 511 | DEF8      | 0.021458587 |
| 512 | PNPLA1    | 0.0214518   |
| 513 | PGLYRP1   | 0.021417955 |
| 514 | SELP      | 0.021295    |
| 515 | FEN1      | 0.021187518 |
| 516 | SLPI      | 0.021176096 |
| 517 | ARIH2     | 0.021153342 |
| 518 | HK3       | 0.021114334 |
| 519 | HIST1H4H  | 0.021113811 |
| 520 | HPSE      | 0.021099743 |
| 521 | EOMES     | 0.02105936  |
| 522 | TRIM56    | 0.021029089 |
| 523 | DEFA3     | 0.020974876 |
| 524 | DEFA4     | 0.020938734 |
| 525 | TAP1      | 0.020932104 |
| 526 | ASH2L     | 0.02081357  |
| 527 | PHCA      | 0.020741675 |

---

---

|     |           |             |
|-----|-----------|-------------|
| 528 | CD160     | 0.020733064 |
| 529 | IMPA2     | 0.020730449 |
| 530 | MMRN1     | 0.020722533 |
| 531 | CCL5      | 0.020702122 |
| 532 | MS4A3     | 0.020700378 |
| 533 | KIAA1602  | 0.020682925 |
| 534 | ADPRHL2   | 0.020677224 |
| 535 | ACSL5     | 0.020669052 |
| 536 | LFNG      | 0.020588497 |
| 537 | C2        | 0.020553833 |
| 538 | PGK1      | 0.020504497 |
| 539 | SCRG1     | 0.02050159  |
| 540 | LOC729776 | 0.02049552  |
| 541 | SERPINB1  | 0.020386754 |
| 542 | TAP2      | 0.020355921 |
| 543 | CTSG      | 0.02031441  |
| 544 | SERPING1  | 0.02026096  |
| 545 | PPP2R4    | 0.02022494  |
| 546 | PHTF1     | 0.020207427 |
| 547 | TREML1    | 0.020172521 |
| 548 | MT2A      | 0.020142818 |
| 549 | ARL4A     | 0.020139668 |
| 550 | NOMO2     | 0.02012099  |
| 551 | CD2       | 0.020113902 |
| 552 | DHCR7     | 0.02008388  |
| 553 | MCM10     | 0.020073675 |
| 554 | KLF4      | 0.020064138 |
| 555 | EIF2C1    | 0.020028686 |
| 556 | DDAH2     | 0.020000152 |
| 557 | CST3      | 0.01998688  |
| 558 | MELK      | 0.019966882 |
| 559 | ALDH4A1   | 0.01996395  |
| 560 | TRAPPC2   | 0.01996133  |
| 561 | ZBTB48    | 0.019936897 |
| 562 | SGSM2     | 0.01991187  |
| 563 | YTHDC1    | 0.019891279 |
| 564 | CLIP1     | 0.01984664  |
| 565 | CLEC1B    | 0.019837521 |
| 566 | IL1B      | 0.019825848 |
| 567 | FLJ11286  | 0.01978219  |
| 568 | P2RX1     | 0.019768542 |
| 569 | SCO2      | 0.019747376 |
| 570 | SPPL2A    | 0.019740261 |
| 571 | PIM3      | 0.019618174 |

---

---

|     |           |             |
|-----|-----------|-------------|
| 572 | IFITM4P   | 0.019576231 |
| 573 | GPR44     | 0.019568408 |
| 574 | C14orf85  | 0.019534012 |
| 575 | ROPN1L    | 0.01952392  |
| 576 | SCAP      | 0.019508915 |
| 577 | SLC22A4   | 0.019502837 |
| 578 | C16orf7   | 0.019487511 |
| 579 | GZMB      | 0.019479705 |
| 580 | CNNM3     | 0.0194427   |
| 581 | RTP4      | 0.019412305 |
| 582 | MAFG      | 0.019377388 |
| 583 | NAMPT     | 0.019325823 |
| 584 | HIST2H2AB | 0.019199995 |
| 585 | HIST1H1C  | 0.019166892 |
| 586 | QARS      | 0.019152198 |
| 587 | NGFRAP1   | 0.019127889 |
| 588 | CAPN13    | 0.019101094 |
| 589 | LOC649181 | 0.019101024 |
| 590 | POLE2     | 0.019089857 |
| 591 | STXBP5    | 0.0190679   |
| 592 | BCL6      | 0.01905768  |
| 593 | PDE5A     | 0.01905051  |
| 594 | BTN3A3    | 0.019035952 |
| 595 | FBL       | 0.019019676 |
| 596 | B3GNT8    | 0.019009892 |
| 597 | CRY2      | 0.018989258 |
| 598 | HES4      | 0.018964248 |
| 599 | ZDHHC14   | 0.018951733 |
| 600 | LOC649150 | 0.018929424 |
| 601 | MYBPH     | 0.018908191 |
| 602 | PLEKHG2   | 0.018905351 |
| 603 | CEACAM8   | 0.018903904 |
| 604 | RUNDC3A   | 0.018867668 |
| 605 | AP3S2     | 0.01886132  |
| 606 | ARS2      | 0.018845746 |
| 607 | C9orf91   | 0.018836847 |
| 608 | LOC728358 | 0.018835666 |
| 609 | TFPI      | 0.018826332 |
| 610 | CLCF1     | 0.018801413 |
| 611 | CHEK1     | 0.018755874 |
| 612 | IDH1      | 0.01863098  |
| 613 | STOM      | 0.01862457  |
| 614 | SCD       | 0.018578324 |
| 615 | LYPLA1    | 0.01857456  |

---

---

|     |           |             |
|-----|-----------|-------------|
| 616 | MTE       | 0.01855141  |
| 617 | NAT8B     | 0.01851833  |
| 618 | ZAP70     | 0.018467085 |
| 619 | TAGAP     | 0.01833723  |
| 620 | ZMYND15   | 0.018289333 |
| 621 | IL5RA     | 0.018278997 |
| 622 | GIMAP4    | 0.018277934 |
| 623 | LY9       | 0.018269109 |
| 624 | TIMM10    | 0.018242996 |
| 625 | EMILIN2   | 0.018193543 |
| 626 | TMC6      | 0.018154025 |
| 627 | SH3GLB1   | 0.018151646 |
| 628 | C11orf51  | 0.01812179  |
| 629 | CEP55     | 0.01807912  |
| 630 | BST2      | 0.018066028 |
| 631 | PERLD1    | 0.01806296  |
| 632 | IFIT5     | 0.018059954 |
| 633 | LOC642103 | 0.018047793 |
| 634 | INTS7     | 0.01802978  |
| 635 | TUBB1     | 0.017972874 |
| 636 | INADL     | 0.01795889  |
| 637 | PSTPIP2   | 0.017900676 |
| 638 | SH3BGRL2  | 0.017899763 |
| 639 | LDLR      | 0.017882066 |
| 640 | KIAA0141  | 0.017877001 |
| 641 | ACAA1     | 0.017873952 |
| 642 | ERP27     | 0.017826132 |
| 643 | LEPREL1   | 0.017792303 |
| 644 | EIF4B     | 0.017783122 |
| 645 | SNX3      | 0.017781984 |
| 646 | Septin.5  | 0.017746191 |
| 647 | PRG2      | 0.017718531 |
| 648 | PRIC285   | 0.017662767 |
| 649 | GBA       | 0.017649973 |
| 650 | PPM1F     | 0.017630858 |
| 651 | MT1E      | 0.017608412 |
| 652 | C9orf156  | 0.017603733 |
| 653 | ATP6V1C1  | 0.01758758  |
| 654 | SFRS17A   | 0.017558632 |
| 655 | PDGFD     | 0.017546464 |
| 656 | SULT1B1   | 0.017529396 |
| 657 | GAPDH     | 0.017503431 |
| 658 | ACSL1     | 0.017473545 |
| 659 | CAV2      | 0.017469993 |

---

---

|     |           |             |
|-----|-----------|-------------|
| 660 | KIF20A    | 0.017467868 |
| 661 | NR3C2     | 0.017434055 |
| 662 | CDC20     | 0.01739643  |
| 663 | LOC116236 | 0.017383153 |
| 664 | SLC4A2    | 0.017347686 |
| 665 | MTL5      | 0.01732682  |
| 666 | PLTP      | 0.017324345 |
| 667 | AKT1      | 0.017323947 |
| 668 | DAAM2     | 0.017323153 |
| 669 | CXCL16    | 0.017286004 |
| 670 | KIF2C     | 0.017280523 |
| 671 | SPOCK2    | 0.017230138 |
| 672 | GGT1      | 0.0171889   |
| 673 | JAM3      | 0.01717332  |
| 674 | DNASE2    | 0.017168844 |
| 675 | TXNDC17   | 0.017159684 |
| 676 | GTF3C6    | 0.017155942 |
| 677 | CD247     | 0.017146787 |
| 678 | S100A6    | 0.017141357 |
| 679 | BIRC5     | 0.017125526 |
| 680 | FLJ20674  | 0.017123537 |
| 681 | VSIG4     | 0.017087653 |
| 682 | STAG3L2   | 0.01708457  |
| 683 | PLD3      | 0.01708175  |
| 684 | CCL2      | 0.017079432 |
| 685 | NR4A2     | 0.017064031 |
| 686 | PAFAH2    | 0.017062293 |
| 687 | ZDHHC3    | 0.017031075 |
| 688 | OGFOD1    | 0.01702207  |
| 689 | CDT1      | 0.016963784 |
| 690 | RNASE3    | 0.016953526 |
| 691 | ADIPOR2   | 0.016928375 |
| 692 | ZNF313    | 0.016919544 |
| 693 | IL11RA    | 0.016889645 |
| 694 | UBTD1     | 0.016887113 |
| 695 | RNF165    | 0.016872978 |
| 696 | BEX1      | 0.016867967 |
| 697 | FHL1      | 0.016866958 |
| 698 | PGM2      | 0.01686642  |
| 699 | DDEF2     | 0.01685734  |
| 700 | SCPEP1    | 0.016842648 |
| 701 | LOC642197 | 0.016828502 |
| 702 | HVCN1     | 0.01682545  |
| 703 | KPNB1     | 0.016797818 |

---



---

|     |           |             |
|-----|-----------|-------------|
| 704 | YPEL1     | 0.016767697 |
| 705 | GPBR      | 0.016767303 |
| 706 | KCNH3     | 0.01674566  |
| 707 | DRAP1     | 0.016673986 |
| 708 | SAMD4A    | 0.016666135 |
| 709 | RNF216    | 0.016609855 |
| 710 | SLC3A2    | 0.016527282 |
| 711 | LOC653600 | 0.016507644 |
| 712 | FBXO6     | 0.016478736 |
| 713 | PTRF      | 0.016466796 |
| 714 | LOC645899 | 0.016463637 |
| 715 | PPAP2C    | 0.016461385 |
| 716 | WIP1      | 0.01645992  |
| 717 | CAMP      | 0.01642723  |
| 718 | RNASE1    | 0.016408643 |
| 719 | CASS4     | 0.016377172 |
| 720 | PPM1M     | 0.016350962 |
| 721 | SLC16A6   | 0.016342187 |
| 722 | BST1      | 0.016339464 |
| 723 | TARP      | 0.01629807  |
| 724 | FCER1G    | 0.016258731 |
| 725 | AGTRAP    | 0.016233604 |
| 726 | SKP1A     | 0.01623047  |
| 727 | ASCC1     | 0.016165517 |
| 728 | IDH3G     | 0.016153228 |
| 729 | PPA2      | 0.016136646 |
| 730 | CTSL1     | 0.01610003  |
| 731 | ZDHHC12   | 0.016055023 |
| 732 | CSAD      | 0.016036918 |
| 733 | LHFPL2    | 0.016030775 |
| 734 | EXOSC4    | 0.016030578 |
| 735 | ITM2B     | 0.016028922 |
| 736 | DNMT1     | 0.016027289 |
| 737 | PTGDS     | 0.015985394 |
| 738 | RGL1      | 0.015955355 |
| 739 | HNRPM     | 0.01595461  |
| 740 | TMEM120A  | 0.015953658 |
| 741 | C1orf122  | 0.015947158 |
| 742 | LOC731049 | 0.015923742 |
| 743 | CEACAM1   | 0.015922928 |
| 744 | PCOLCE2   | 0.015881274 |
| 745 | TCN1      | 0.015874537 |
| 746 | PSCDBP    | 0.015859433 |
| 747 | TMEM43    | 0.015841225 |

---

---

|     |           |             |
|-----|-----------|-------------|
| 748 | CD82      | 0.015836744 |
| 749 | ID3       | 0.015831484 |
| 750 | SGSH      | 0.015827818 |
| 751 | PRC1      | 0.015817499 |
| 752 | SYN1      | 0.015803896 |
| 753 | ASB1      | 0.015792836 |
| 754 | C1orf176  | 0.015757743 |
| 755 | MCM4      | 0.015746105 |
| 756 | RNF149    | 0.015734931 |
| 757 | TRIM22    | 0.0157217   |
| 758 | B3GALTL   | 0.01571544  |
| 759 | LOC441019 | 0.015693847 |
| 760 | MATK      | 0.015672201 |
| 761 | TRIM26    | 0.01560649  |
| 762 | IL1RAP    | 0.015592199 |
| 763 | SLC25A20  | 0.015589159 |
| 764 | HIST1H3H  | 0.015582838 |
| 765 | BCAT1     | 0.015559865 |
| 766 | NTN2L     | 0.015555343 |
| 767 | KLHL2     | 0.015553681 |
| 768 | DCUN1D1   | 0.015513774 |
| 769 | CYP1B1    | 0.015507618 |
| 770 | HCG27     | 0.015501901 |
| 771 | MCTP1     | 0.015493603 |
| 772 | SNORD16   | 0.015432087 |
| 773 | PHF11     | 0.015429528 |
| 774 | STX16     | 0.01542332  |
| 775 | AZU1      | 0.015420154 |
| 776 | ZMYM6     | 0.015401263 |
| 777 | PIK4CA    | 0.015395064 |
| 778 | EFTUD2    | 0.015388976 |
| 779 | MYL6B     | 0.015375888 |
| 780 | NUMB      | 0.015368279 |
| 781 | PCCB      | 0.01535732  |
| 782 | TXNDC4    | 0.015304701 |
| 783 | ZNF650    | 0.015264327 |
| 784 | CDCA7     | 0.015237022 |
| 785 | ANKRD33   | 0.015230916 |
| 786 | DIRC2     | 0.015225514 |
| 787 | LOC728226 | 0.015215064 |
| 788 | PRKCZ     | 0.015184731 |
| 789 | NCAPG     | 0.015095498 |
| 790 | TKTL1     | 0.015091131 |
| 791 | D4S234E   | 0.015071414 |

---

---

|     |           |             |
|-----|-----------|-------------|
| 792 | NASP      | 0.015060757 |
| 793 | MAD2L2    | 0.015048878 |
| 794 | LBH       | 0.0150397   |
| 795 | EPN2      | 0.015033911 |
| 796 | LOC728519 | 0.015031331 |
| 797 | SDHD      | 0.014987564 |
| 798 | PRKCH     | 0.014972194 |
| 799 | MAPK8IP3  | 0.014963495 |
| 800 | DNAJB2    | 0.01495572  |
| 801 | MAOA      | 0.014932171 |
| 802 | HNRNPL    | 0.014926896 |
| 803 | MX2       | 0.014918705 |
| 804 | THOC6     | 0.014916116 |
| 805 | PSME1     | 0.014914813 |
| 806 | GOLGA8A   | 0.014914719 |
| 807 | LILRB2    | 0.014887289 |
| 808 | PPBP      | 0.014829229 |
| 809 | HIST2H3C  | 0.014820373 |
| 810 | LOC284023 | 0.014759242 |
| 811 | ABCB1     | 0.01475171  |
| 812 | NFKBIZ    | 0.0147312   |
| 813 | LOC651309 | 0.014725514 |
| 814 | RASSF1    | 0.014724929 |
| 815 | C6orf173  | 0.014713562 |
| 816 | SPAG7     | 0.014681242 |
| 817 | PDZD4     | 0.014673704 |
| 818 | RUNX3     | 0.014671263 |
| 819 | LOC644615 | 0.014669672 |
| 820 | P2RY10    | 0.014654827 |
| 821 | HIPK3     | 0.014635556 |
| 822 | SLC40A1   | 0.014607379 |
| 823 | NPEPPS    | 0.014570701 |
| 824 | LOC653610 | 0.014561166 |
| 825 | ZNF324    | 0.014556006 |
| 826 | TNFAIP6   | 0.014539249 |
| 827 | HABP4     | 0.014538573 |
| 828 | PPP2R2D   | 0.014533855 |
| 829 | LAPTM5    | 0.014529815 |
| 830 | BRD7      | 0.014519431 |
| 831 | WDR51A    | 0.014494903 |
| 832 | ASB8      | 0.014485191 |
| 833 | RGL2      | 0.014482684 |
| 834 | TBC1D7    | 0.014459589 |
| 835 | GPAA1     | 0.014411835 |

---

---

|     |               |             |
|-----|---------------|-------------|
| 836 | CD74          | 0.014402886 |
| 837 | CATSPER2      | 0.014402645 |
| 838 | IPO11         | 0.014398616 |
| 839 | MCRS1         | 0.014393479 |
| 840 | GZMK          | 0.014369302 |
| 841 | POFUT1        | 0.014366225 |
| 842 | ACACB         | 0.014357067 |
| 843 | GIMAP6        | 0.014335445 |
| 844 | C9orf127      | 0.014334979 |
| 845 | RBM39         | 0.014329486 |
| 846 | MAPK14        | 0.014297327 |
| 847 | FCRL6         | 0.014296066 |
| 848 | TXNDC12       | 0.014248626 |
| 849 | GZMH          | 0.014241454 |
| 850 | CCNB2         | 0.014231688 |
| 851 | M6PRBP1       | 0.014218399 |
| 852 | GPR42         | 0.014208751 |
| 853 | ITGAX         | 0.014201901 |
| 854 | SLC30A1       | 0.014196856 |
| 855 | SPRYD5        | 0.014162273 |
| 856 | HYAL2         | 0.014142439 |
| 857 | TRIP13        | 0.014095361 |
| 858 | GIMAP5        | 0.014092067 |
| 859 | LOC653874     | 0.014032519 |
| 860 | NAIP          | 0.014015415 |
| 861 | SAMSN1        | 0.014013672 |
| 862 | DYM           | 0.013972525 |
| 863 | COL4A3BP      | 0.013943324 |
| 864 | PIWIL4        | 0.013920275 |
| 865 | CDC25A        | 0.013877048 |
| 866 | DKFZp586I1420 | 0.013860132 |
| 867 | CC2D2B        | 0.013848544 |
| 868 | APH1B         | 0.01384165  |
| 869 | GADD45A       | 0.013834119 |
| 870 | NCOA7         | 0.013820385 |
| 871 | LOC400455     | 0.013814438 |
| 872 | CDH6          | 0.013814194 |
| 873 | DSC2          | 0.013811191 |
| 874 | MFNG          | 0.013802412 |
| 875 | ST3GAL5       | 0.013802212 |
| 876 | ZCCHC2        | 0.013793991 |
| 877 | KIAA0556      | 0.013789807 |
| 878 | C16orf75      | 0.01377513  |
| 879 | MPZL1         | 0.013745721 |

---

---

|     |           |             |
|-----|-----------|-------------|
| 880 | C7orf54   | 0.01373986  |
| 881 | HCG4      | 0.013726248 |
| 882 | PNPLA6    | 0.013723044 |
| 883 | EIF3K     | 0.013722493 |
| 884 | OLR1      | 0.013722316 |
| 885 | PFKFB2    | 0.013703841 |
| 886 | FLOT1     | 0.013702858 |
| 887 | RNU12     | 0.013683008 |
| 888 | IGFBP7    | 0.013650243 |
| 889 | COBRA1    | 0.013643943 |
| 890 | IFI16     | 0.013633167 |
| 891 | DNAH1     | 0.013615419 |
| 892 | NUP205    | 0.013612662 |
| 893 | CLTA      | 0.013611604 |
| 894 | TUBGCP6   | 0.013601543 |
| 895 | CALD1     | 0.013592073 |
| 896 | LOC731486 | 0.013583198 |
| 897 | LOC650029 | 0.013571529 |
| 898 | KLRG1     | 0.01354102  |
| 899 | FKBP9L    | 0.013505356 |
| 900 | SLC36A4   | 0.013483145 |
| 901 | FAM100A   | 0.013458293 |
| 902 | PEX16     | 0.013446705 |
| 903 | IL4R      | 0.013441504 |
| 904 | GGH       | 0.013440516 |
| 905 | FBXW5     | 0.013408241 |
| 906 | EPDR1     | 0.013401316 |
| 907 | C3orf19   | 0.013398958 |
| 908 | AGPAT2    | 0.013390445 |
| 909 | CTRC      | 0.013380507 |
| 910 | ORM2      | 0.013376521 |
| 911 | NCK2      | 0.013368621 |
| 912 | PPP1R13B  | 0.013349657 |
| 913 | AMPD3     | 0.01333878  |
| 914 | STIM2     | 0.013324203 |
| 915 | ACSS2     | 0.013322527 |
| 916 | HIST1H2BC | 0.013316649 |
| 917 | TIFA      | 0.013290409 |
| 918 | CMAS      | 0.013284997 |
| 919 | NUBP1     | 0.013275925 |
| 920 | FCGBP     | 0.013247535 |
| 921 | LOC400948 | 0.013213026 |
| 922 | ATP2C1    | 0.013199727 |
| 923 | ELF1      | 0.013195209 |

---

---

|     |           |             |
|-----|-----------|-------------|
| 924 | DDX58     | 0.013177802 |
| 925 | PAQR4     | 0.013170168 |
| 926 | PSMB7     | 0.013138246 |
| 927 | C22orf28  | 0.013089403 |
| 928 | LMTK3     | 0.01307773  |
| 929 | ALPL      | 0.01302652  |
| 930 | ACPP      | 0.013015856 |
| 931 | TSEN54    | 0.012998685 |
| 932 | GLA       | 0.012997121 |
| 933 | LTF       | 0.012985386 |
| 934 | AMICA1    | 0.012980652 |
| 935 | OTUD1     | 0.012972485 |
| 936 | NOMO1     | 0.012953504 |
| 937 | PARP14    | 0.012949769 |
| 938 | NSUN7     | 0.012943476 |
| 939 | LRRC26    | 0.012943079 |
| 940 | KIF15     | 0.012938856 |
| 941 | KCNJ15    | 0.012934249 |
| 942 | TP53I13   | 0.012911253 |
| 943 | ATP5O     | 0.012910927 |
| 944 | EDG8      | 0.012910841 |
| 945 | DPM3      | 0.012908385 |
| 946 | FCGR3A    | 0.012867292 |
| 947 | M160      | 0.012846922 |
| 948 | APOL1     | 0.012841008 |
| 949 | PTTG3     | 0.012838488 |
| 950 | NUB1      | 0.012828819 |
| 951 | TBL1X     | 0.012796148 |
| 952 | ASPM      | 0.012794794 |
| 953 | DPEP3     | 0.012789182 |
| 954 | COX15     | 0.012786388 |
| 955 | ANXA5     | 0.012785632 |
| 956 | GRWD1     | 0.012779757 |
| 957 | CTSK      | 0.012758706 |
| 958 | TMEM150   | 0.012748265 |
| 959 | BLCAP     | 0.012735387 |
| 960 | SARM1     | 0.012693447 |
| 961 | NBPF10    | 0.012682198 |
| 962 | CD96      | 0.012676305 |
| 963 | MKL1      | 0.012662598 |
| 964 | SYTL2     | 0.012648382 |
| 965 | ITGB5     | 0.012632972 |
| 966 | LOC387820 | 0.012620901 |
| 967 | GBP4      | 0.012611347 |

---

---

|      |           |             |
|------|-----------|-------------|
| 968  | LOC90586  | 0.012607112 |
| 969  | DDX24     | 0.012604932 |
| 970  | PARP10    | 0.012592932 |
| 971  | ENTPD7    | 0.012587684 |
| 972  | C21orf2   | 0.012574775 |
| 973  | LOC440503 | 0.012572026 |
| 974  | SAMD9     | 0.012555404 |
| 975  | CXorf12   | 0.012551255 |
| 976  | LOC400759 | 0.012549098 |
| 977  | EEF1D     | 0.012544346 |
| 978  | PAQR8     | 0.012517408 |
| 979  | TNFRSF21  | 0.012480469 |
| 980  | POMP      | 0.012478161 |
| 981  | SPARC     | 0.012452526 |
| 982  | LOC654103 | 0.012448387 |
| 983  | GPI       | 0.012444296 |
| 984  | C5orf30   | 0.012443111 |
| 985  | FAM39DP   | 0.012438344 |
| 986  | TOR1B     | 0.012417256 |
| 987  | MAPBPIP   | 0.012372838 |
| 988  | USP32     | 0.012328344 |
| 989  | GSDMDC1   | 0.012311959 |
| 990  | LRRC42    | 0.012290056 |
| 991  | CEBPE     | 0.012281947 |
| 992  | ALAS2     | 0.012227359 |
| 993  | EFCBP1    | 0.012219781 |
| 994  | EGLN2     | 0.012209061 |
| 995  | TNFSF4    | 0.012207162 |
| 996  | CYP2J2    | 0.01220471  |
| 997  | CD6       | 0.012191396 |
| 998  | LOC644774 | 0.012172819 |
| 999  | GRN       | 0.012156684 |
| 1000 | TCF20     | 0.012148983 |
| 1001 | SETD8     | 0.012146484 |
| 1002 | GSDML     | 0.012120246 |
| 1003 | GYS1      | 0.012105678 |
| 1004 | F13A1     | 0.012082905 |
| 1005 | FAM102A   | 0.012081907 |
| 1006 | LOC653316 | 0.012042712 |
| 1007 | SFRS5     | 0.01203652  |
| 1008 | TGFBR3    | 0.011995534 |
| 1009 | SOD2      | 0.011978569 |
| 1010 | ISG20     | 0.011968982 |
| 1011 | KIAA1958  | 0.011963286 |

---

---

|      |           |             |
|------|-----------|-------------|
| 1012 | IL2RB     | 0.01195496  |
| 1013 | TK1       | 0.011950892 |
| 1014 | CLEC4D    | 0.011946553 |
| 1015 | HIST1H2BE | 0.011927377 |
| 1016 | EZH2      | 0.011896962 |
| 1017 | TBPL1     | 0.011892813 |
| 1018 | TNRC6A    | 0.011886051 |
| 1019 | UBE4B     | 0.011873256 |
| 1020 | SLC38A10  | 0.011871461 |
| 1021 | PTGDR     | 0.011861367 |
| 1022 | NDUFA1    | 0.011860793 |
| 1023 | NDUFS4    | 0.011839767 |
| 1024 | MOV10     | 0.01177349  |
| 1025 | CASP5     | 0.011758487 |
| 1026 | PITPNC1   | 0.011756332 |
| 1027 | MGC3020   | 0.011747954 |
| 1028 | TMEM140   | 0.011681878 |
| 1029 | RCC2      | 0.011676923 |
| 1030 | NAP5      | 0.011675384 |
| 1031 | NEDD8     | 0.01164528  |
| 1032 | MMP25     | 0.011588017 |
| 1033 | SP140     | 0.011586698 |
| 1034 | MAGT1     | 0.011573812 |
| 1035 | CTGLF3    | 0.011557052 |
| 1036 | ERAL1     | 0.011532807 |
| 1037 | CXCL10    | 0.011523033 |
| 1038 | CDCA3     | 0.011519279 |
| 1039 | MPST      | 0.011512375 |
| 1040 | TPM2      | 0.011491964 |
| 1041 | ACP6      | 0.011455786 |
| 1042 | TNPO1     | 0.011422577 |
| 1043 | MLKL      | 0.01133194  |
| 1044 | DUSP3     | 0.011330252 |
| 1045 | FAM43A    | 0.011329893 |
| 1046 | SLC25A42  | 0.011311555 |
| 1047 | TUBG1     | 0.011310267 |
| 1048 | CHN2      | 0.011293788 |
| 1049 | CKAP4     | 0.011289164 |
| 1050 | LOC285176 | 0.011281674 |
| 1051 | GBP5      | 0.011241755 |
| 1052 | MKNK1     | 0.011234328 |
| 1053 | FFAR3     | 0.011230953 |
| 1054 | N4BP2     | 0.011220849 |
| 1055 | LMO2      | 0.011191943 |

---



---

|      |           |             |
|------|-----------|-------------|
| 1056 | EXOC6     | 0.011174746 |
| 1057 | CENPM     | 0.011171455 |
| 1058 | STIL      | 0.011164754 |
| 1059 | CMTM4     | 0.011149094 |
| 1060 | RBM10     | 0.011144616 |
| 1061 | RPL3      | 0.01111458  |
| 1062 | ADAR      | 0.011092219 |
| 1063 | KLF12     | 0.011085765 |
| 1064 | MAP3K4    | 0.011066765 |
| 1065 | MCM6      | 0.01105802  |
| 1066 | LOC642684 | 0.011057086 |
| 1067 | AURKA     | 0.01104202  |
| 1068 | SLFN5     | 0.011040498 |
| 1069 | HJURP     | 0.011012559 |
| 1070 | IL10RB    | 0.010999957 |
| 1071 | DSE       | 0.010998072 |
| 1072 | LOC23117  | 0.010986466 |
| 1073 | POLB      | 0.010980488 |
| 1074 | CNDP2     | 0.010979126 |
| 1075 | BCAS4     | 0.010973783 |
| 1076 | KIAA1530  | 0.010968846 |
| 1077 | KIFC1     | 0.010959549 |
| 1078 | SIL1      | 0.010954495 |
| 1079 | MLL       | 0.010948492 |
| 1080 | IAH1      | 0.010946958 |
| 1081 | ZNF232    | 0.010946235 |
| 1082 | TPP1      | 0.010933366 |
| 1083 | FBXL5     | 0.010928297 |
| 1084 | RALGPS1   | 0.010905361 |
| 1085 | ETV7      | 0.010884118 |
| 1086 | C16orf72  | 0.010844552 |
| 1087 | IDH3A     | 0.010832509 |
| 1088 | TRIM5     | 0.010829678 |
| 1089 | NEDD4     | 0.010827194 |
| 1090 | GUCY1A3   | 0.010826338 |
| 1091 | B4GALT5   | 0.010802129 |
| 1092 | LRRFIP2   | 0.010797371 |
| 1093 | TNFAIP1   | 0.010784218 |
| 1094 | PYHIN1    | 0.010776212 |
| 1095 | HIST1H3D  | 0.010775675 |
| 1096 | CICE      | 0.010751937 |
| 1097 | ARRDC4    | 0.010734148 |
| 1098 | MXD3      | 0.010728274 |
| 1099 | TXN       | 0.010718829 |

---

---

|      |            |             |
|------|------------|-------------|
| 1100 | PIK3R1     | 0.010700767 |
| 1101 | PLEKHA1    | 0.010687778 |
| 1102 | PUM1       | 0.010671654 |
| 1103 | PTPRA      | 0.010671137 |
| 1104 | ACVR1B     | 0.01066601  |
| 1105 | CCR6       | 0.010655877 |
| 1106 | COQ10A     | 0.010650252 |
| 1107 | LOC643596  | 0.010646355 |
| 1108 | PGM1       | 0.010631808 |
| 1109 | SPG3A      | 0.010610228 |
| 1110 | ZNF438     | 0.010565481 |
| 1111 | GLB1L      | 0.0105542   |
| 1112 | PEA15      | 0.010548866 |
| 1113 | RFTN1      | 0.010547032 |
| 1114 | PSME2      | 0.010528795 |
| 1115 | XPNPEP3    | 0.01052742  |
| 1116 | TMEM17     | 0.010519658 |
| 1117 | KIFAP3     | 0.010517431 |
| 1118 | ICA1       | 0.010514568 |
| 1119 | SBK1       | 0.010514468 |
| 1120 | EFEMP2     | 0.0105104   |
| 1121 | TCTEX1D1   | 0.01048875  |
| 1122 | DTL        | 0.010484005 |
| 1123 | PRKACA     | 0.010480485 |
| 1124 | NPIP       | 0.010476457 |
| 1125 | PABPC4     | 0.010468722 |
| 1126 | CD59       | 0.010462991 |
| 1127 | GCS1       | 0.010428862 |
| 1128 | PDK3       | 0.010421142 |
| 1129 | HMGB2      | 0.010410629 |
| 1130 | GPR63      | 0.010399694 |
| 1131 | NELL2      | 0.010386252 |
| 1132 | SLC11A1    | 0.010373138 |
| 1133 | LOC347376  | 0.01037035  |
| 1134 | RPL32      | 0.010332351 |
| 1135 | TIAF1      | 0.010308945 |
| 1136 | LTB4R      | 0.010300804 |
| 1137 | RTN3       | 0.010292886 |
| 1138 | ST6GALNAC3 | 0.010284602 |
| 1139 | PLEKHA9    | 0.010284564 |
| 1140 | HMMR       | 0.01024456  |
| 1141 | GSN        | 0.010233641 |
| 1142 | LOC648733  | 0.01022899  |
| 1143 | KIF11      | 0.010228545 |

---

---

|      |           |             |
|------|-----------|-------------|
| 1144 | KIF14     | 0.010227707 |
| 1145 | EIF3F     | 0.010216726 |
| 1146 | C12orf65  | 0.010198038 |
| 1147 | HMGA1     | 0.010178953 |
| 1148 | NDUFS5    | 0.010172631 |
| 1149 | TRIP6     | 0.010133943 |
| 1150 | ENY2      | 0.010125286 |
| 1151 | PSD4      | 0.010114933 |
| 1152 | PICALM    | 0.010099857 |
| 1153 | LILRA5    | 0.010077616 |
| 1154 | C20orf20  | 0.010063808 |
| 1155 | NUFIP2    | 0.01005537  |
| 1156 | MSRB3     | 0.010047778 |
| 1157 | ATG16L1   | 0.010044058 |
| 1158 | SFRS7     | 0.010039318 |
| 1159 | IREB2     | 0.010035864 |
| 1160 | CPSF2     | 0.010020252 |
| 1161 | TMEM32    | 0.010011863 |
| 1162 | GPR114    | 0.00999616  |
| 1163 | RAB27A    | 0.009993166 |
| 1164 | NPC1      | 0.009992271 |
| 1165 | ATXN1     | 0.009963345 |
| 1166 | DHX33     | 0.00994299  |
| 1167 | APOL6     | 0.009919581 |
| 1168 | RABGEF1   | 0.009908965 |
| 1169 | CYBRD1    | 0.00989575  |
| 1170 | YY1AP1    | 0.009894546 |
| 1171 | CDK5RAP3  | 0.00988984  |
| 1172 | WDR57     | 0.009878377 |
| 1173 | KIAA0182  | 0.009860393 |
| 1174 | BICD2     | 0.009850672 |
| 1175 | PPM1H     | 0.009824904 |
| 1176 | C11orf2   | 0.009810955 |
| 1177 | UXT       | 0.009791121 |
| 1178 | LILRA6    | 0.009760801 |
| 1179 | HIST1H2AM | 0.009749029 |
| 1180 | KIAA0355  | 0.009734105 |
| 1181 | PSMD5     | 0.009726184 |
| 1182 | CYFIP2    | 0.009702235 |
| 1183 | C1orf63   | 0.009696186 |
| 1184 | CSNK1E    | 0.009620887 |
| 1185 | GPR109A   | 0.009596605 |
| 1186 | LIN7A     | 0.009569323 |
| 1187 | LGALS9    | 0.009557037 |

---

---

|      |           |             |
|------|-----------|-------------|
| 1188 | NLRP12    | 0.009552894 |
| 1189 | LOC728734 | 0.009523504 |
| 1190 | PCNXL2    | 0.009521368 |
| 1191 | RFWD2     | 0.009509555 |
| 1192 | AFF4      | 0.009501607 |
| 1193 | NIPA1     | 0.00949253  |
| 1194 | GTF2IRD2B | 0.009446656 |
| 1195 | BAZ1B     | 0.009429066 |
| 1196 | ZNF684    | 0.00941415  |
| 1197 | DOK2      | 0.00941283  |
| 1198 | THYN1     | 0.009372008 |
| 1199 | C18orf56  | 0.009367305 |
| 1200 | DLG7      | 0.009345059 |
| 1201 | NDUFA9    | 0.009333497 |
| 1202 | WBSCR22   | 0.009288691 |
| 1203 | TNFAIP8L3 | 0.00926352  |
| 1204 | DUSP5     | 0.009262597 |
| 1205 | LRRC37B   | 0.009246489 |
| 1206 | MGC4677   | 0.009243102 |
| 1207 | GALM      | 0.009218612 |
| 1208 | DNAJC3    | 0.009201949 |
| 1209 | C14orf156 | 0.009191473 |
| 1210 | TPX2      | 0.009167875 |
| 1211 | UBAC2     | 0.009141255 |
| 1212 | SNORD35B  | 0.009133495 |
| 1213 | RLF       | 0.009123242 |
| 1214 | F5        | 0.009118201 |
| 1215 | UQCRC1    | 0.009097804 |
| 1216 | PCSK7     | 0.009095251 |
| 1217 | AMZ2      | 0.009091831 |
| 1218 | CASP4     | 0.009075471 |
| 1219 | LOC441124 | 0.009038731 |
| 1220 | PRCP      | 0.009020548 |
| 1221 | SMG7      | 0.008993492 |
| 1222 | HIST1H3F  | 0.008983509 |
| 1223 | CDK5RAP1  | 0.00896439  |
| 1224 | TREML3    | 0.008937012 |
| 1225 | ARPC5     | 0.008896569 |
| 1226 | ARL6IP5   | 0.008878482 |
| 1227 | LMBRD1    | 0.008875868 |
| 1228 | GCH1      | 0.008871401 |
| 1229 | NECAB1    | 0.008866258 |
| 1230 | RUFY3     | 0.008845214 |
| 1231 | C9orf30   | 0.008842197 |

---

---

|      |           |             |
|------|-----------|-------------|
| 1232 | YWHAZ     | 0.008822886 |
| 1233 | ZNF250    | 0.008812364 |
| 1234 | RAB2A     | 0.008793056 |
| 1235 | NUDT1     | 0.008779469 |
| 1236 | ARRDC3    | 0.00877423  |
| 1237 | VAMP2     | 0.008715205 |
| 1238 | MGC18216  | 0.008698422 |
| 1239 | RFNG      | 0.008618612 |
| 1240 | TROAP     | 0.008617588 |
| 1241 | AP1G2     | 0.008615644 |
| 1242 | PTTG1     | 0.008596581 |
| 1243 | TBL2      | 0.008571566 |
| 1244 | PLEKHO1   | 0.008556368 |
| 1245 | SUMF1     | 0.00854998  |
| 1246 | C10orf119 | 0.008546816 |
| 1247 | PPP3CA    | 0.008539166 |
| 1248 | IDH3B     | 0.008533645 |
| 1249 | MBOAT2    | 0.008522718 |
| 1250 | DCTN6     | 0.008502529 |
| 1251 | KMO       | 0.008496771 |
| 1252 | FBXO30    | 0.008494517 |
| 1253 | KRAS      | 0.008447561 |
| 1254 | CLSTN1    | 0.008419709 |
| 1255 | PAPD1     | 0.008377329 |
| 1256 | HIST1H4D  | 0.008364075 |
| 1257 | EXOSC6    | 0.008324399 |
| 1258 | MR1       | 0.008310639 |
| 1259 | CCM2      | 0.008297909 |
| 1260 | CD4       | 0.008272281 |
| 1261 | L3MBTL2   | 0.008263224 |
| 1262 | TNFSF10   | 0.008246884 |
| 1263 | LOC653381 | 0.008204727 |
| 1264 | FGF9      | 0.008195646 |
| 1265 | RNPS1     | 0.008182027 |
| 1266 | DMWD      | 0.008158235 |
| 1267 | C18orf25  | 0.008147028 |
| 1268 | LRSAM1    | 0.00813731  |
| 1269 | TBC1D14   | 0.008109965 |
| 1270 | TRERF1    | 0.00810631  |
| 1271 | ISY1      | 0.008086188 |
| 1272 | LOC653489 | 0.008063727 |
| 1273 | PLXNB1    | 0.008042927 |
| 1274 | ZNF655    | 0.008028424 |
| 1275 | IMPDH1    | 0.008012719 |

---

---

|      |           |             |
|------|-----------|-------------|
| 1276 | MRPS18C   | 0.00800896  |
| 1277 | KIAA0753  | 0.007997148 |
| 1278 | ZNF766    | 0.007986621 |
| 1279 | ACOT9     | 0.007970508 |
| 1280 | MAT2B     | 0.007968793 |
| 1281 | CHMP4B    | 0.007934983 |
| 1282 | C1orf108  | 0.007926851 |
| 1283 | PARP11    | 0.007865517 |
| 1284 | NDUFS7    | 0.00784798  |
| 1285 | RAB31     | 0.007798489 |
| 1286 | TXNRD1    | 0.007788276 |
| 1287 | PPP2R2B   | 0.007783691 |
| 1288 | LARP1     | 0.00776552  |
| 1289 | PTPN12    | 0.007756417 |
| 1290 | PKN1      | 0.007745196 |
| 1291 | TLR8      | 0.007711188 |
| 1292 | C8orf37   | 0.007706942 |
| 1293 | POLQ      | 0.007704428 |
| 1294 | KIF1B     | 0.007700739 |
| 1295 | PLEKHF1   | 0.007684927 |
| 1296 | PSMF1     | 0.007657777 |
| 1297 | NCF4      | 0.007646165 |
| 1298 | GPR109B   | 0.007629804 |
| 1299 | PNPO      | 0.007607095 |
| 1300 | CMIP      | 0.007597155 |
| 1301 | LOC652489 | 0.007594061 |
| 1302 | DICER1    | 0.00757869  |
| 1303 | PBXIP1    | 0.007552673 |
| 1304 | C11orf48  | 0.007531799 |
| 1305 | FAM20C    | 0.007514838 |
| 1306 | ARHGAP25  | 0.007497664 |
| 1307 | RXRG      | 0.007479575 |
| 1308 | GTDC1     | 0.0074719   |
| 1309 | SULT1A1   | 0.007467143 |
| 1310 | CBX3      | 0.007436579 |
| 1311 | SFI1      | 0.007428917 |
| 1312 | GBE1      | 0.007355103 |
| 1313 | GPR1      | 0.00728505  |
| 1314 | PAPD4     | 0.007272772 |
| 1315 | ZNF275    | 0.007259716 |
| 1316 | C4orf32   | 0.007222125 |
| 1317 | GRK5      | 0.007215675 |
| 1318 | CENTD2    | 0.007142817 |
| 1319 | ERO1L     | 0.007131711 |

---

---

|      |           |             |
|------|-----------|-------------|
| 1320 | KIAA1751  | 0.007114423 |
| 1321 | KEAP1     | 0.00706955  |
| 1322 | SNX11     | 0.007068586 |
| 1323 | PANK2     | 0.007062918 |
| 1324 | ERCC1     | 0.007051428 |
| 1325 | BUB1      | 0.007030262 |
| 1326 | NOL1      | 0.007014556 |
| 1327 | OSBPL7    | 0.007005363 |
| 1328 | UBE3B     | 0.006995409 |
| 1329 | VPS26A    | 0.006960535 |
| 1330 | DUSP8     | 0.006947716 |
| 1331 | RAD23B    | 0.00694376  |
| 1332 | CR1       | 0.006920168 |
| 1333 | SEC24A    | 0.006915167 |
| 1334 | LOC286208 | 0.006907798 |
| 1335 | Septin.2  | 0.006898051 |
| 1336 | DHRS4     | 0.006861588 |
| 1337 | LOC654346 | 0.006843237 |
| 1338 | LOC650739 | 0.006817977 |
| 1339 | RAP2C     | 0.006816534 |
| 1340 | CALML4    | 0.006799767 |
| 1341 | SMOC1     | 0.006797301 |
| 1342 | CACYBP    | 0.006791075 |
| 1343 | PFKFB3    | 0.006755015 |
| 1344 | CIP29     | 0.00671978  |
| 1345 | C10orf76  | 0.006672749 |
| 1346 | ELMO1     | 0.006624717 |
| 1347 | ENTPD6    | 0.006624408 |
| 1348 | TOR1AIP1  | 0.006609555 |
| 1349 | LOC648249 | 0.006564074 |
| 1350 | HTR2A     | 0.006558628 |
| 1351 | MZF1      | 0.00653798  |
| 1352 | C19orf48  | 0.006507433 |
| 1353 | SCFD1     | 0.006495435 |
| 1354 | MSRA      | 0.006477263 |
| 1355 | INTS8     | 0.006461705 |
| 1356 | TNRC6B    | 0.006411369 |
| 1357 | NGRN      | 0.006407587 |
| 1358 | DCLRE1C   | 0.006379104 |
| 1359 | C18orf24  | 0.006356631 |
| 1360 | RABL2B    | 0.006349864 |
| 1361 | FIP1L1    | 0.006335019 |
| 1362 | DNASE1L1  | 0.006321153 |
| 1363 | TRADD     | 0.006312053 |

---

---

|      |           |             |
|------|-----------|-------------|
| 1364 | SLC25A25  | 0.006291953 |
| 1365 | BANF1     | 0.006290446 |
| 1366 | DIAPH2    | 0.006278479 |
| 1367 | ANXA7     | 0.006262228 |
| 1368 | VEGFB     | 0.006257115 |
| 1369 | CD38      | 0.006196103 |
| 1370 | NUS1      | 0.006176098 |
| 1371 | OTUB1     | 0.006175526 |
| 1372 | JARID1A   | 0.006169679 |
| 1373 | ATP11B    | 0.006162326 |
| 1374 | LOC647349 | 0.006151536 |
| 1375 | ILF3      | 0.006130852 |
| 1376 | ATP1A1    | 0.006104243 |
| 1377 | COMT      | 0.006095764 |
| 1378 | PHF23     | 0.006087174 |
| 1379 | C6orf106  | 0.006063687 |
| 1380 | THAP7     | 0.006056223 |
| 1381 | DNAJC5    | 0.006046054 |
| 1382 | CCNB1IP1  | 0.006044701 |
| 1383 | AGPAT1    | 0.006025722 |
| 1384 | CD58      | 0.006009982 |
| 1385 | LILRB1    | 0.005970483 |
| 1386 | AMY1A     | 0.00595138  |
| 1387 | APOL3     | 0.00592083  |
| 1388 | HDGF2     | 0.00591703  |
| 1389 | ERN1      | 0.005865675 |
| 1390 | FAM115A   | 0.005844747 |
| 1391 | NBPF20    | 0.005839791 |
| 1392 | FLAD1     | 0.005829248 |
| 1393 | ANKMY1    | 0.005826008 |
| 1394 | CYB5R4    | 0.005774265 |
| 1395 | KCTD18    | 0.0057705   |
| 1396 | SNHG10    | 0.005770351 |
| 1397 | GNPTAB    | 0.005754393 |
| 1398 | UBN1      | 0.005668834 |
| 1399 | CTNS      | 0.005633919 |
| 1400 | EIF2B4    | 0.005627726 |
| 1401 | XRN2      | 0.005610916 |
| 1402 | MCM7      | 0.005582143 |
| 1403 | BMS1      | 0.005544674 |
| 1404 | APPL1     | 0.005519975 |
| 1405 | PPP2R5C   | 0.005483373 |
| 1406 | TRAF3IP2  | 0.005381979 |
| 1407 | EAF1      | 0.005341584 |

---



---

|      |           |             |
|------|-----------|-------------|
| 1408 | LOC647856 | 0.005292656 |
| 1409 | PTP4A2    | 0.005286907 |
| 1410 | MCM8      | 0.005259822 |
| 1411 | DBNDD2    | 0.005213247 |
| 1412 | ZMYND11   | 0.005182114 |
| 1413 | SLC2A14   | 0.005155345 |
| 1414 | PREPL     | 0.005146117 |
| 1415 | PEMT      | 0.005131908 |
| 1416 | FLI1      | 0.005105292 |
| 1417 | PHF13     | 0.005035184 |
| 1418 | LOC387856 | 0.005030211 |
| 1419 | UBE2G2    | 0.005008785 |
| 1420 | DR1       | 0.004973283 |
| 1421 | COQ6      | 0.004926606 |
| 1422 | FKSG30    | 0.004895988 |
| 1423 | TADA3L    | 0.004873728 |
| 1424 | ALDOA     | 0.004825061 |
| 1425 | C21orf59  | 0.004819018 |
| 1426 | ARPC4     | 0.00480946  |
| 1427 | VAR5      | 0.004745816 |
| 1428 | OPRL1     | 0.004730539 |
| 1429 | DDX19B    | 0.004717386 |
| 1430 | ST3GAL1   | 0.004698379 |
| 1431 | NGLY1     | 0.004697001 |
| 1432 | DHTKD1    | 0.004645243 |
| 1433 | LOC644935 | 0.004606404 |
| 1434 | ARHGEF3   | 0.00460185  |
| 1435 | NLRP8     | 0.004598584 |
| 1436 | UBE2E3    | 0.004482603 |
| 1437 | NIPBL     | 0.004482271 |
| 1438 | SHOC2     | 0.004440879 |
| 1439 | FKBP2     | 0.0043998   |
| 1440 | UBE2Z     | 0.004391192 |
| 1441 | RAPGEF1   | 0.00435577  |
| 1442 | SPN       | 0.004323962 |
| 1443 | SCAMP3    | 0.004252011 |
| 1444 | HM13      | 0.004219953 |
| 1445 | RPS6KB2   | 0.004196337 |
| 1446 | MRPS12    | 0.004190696 |
| 1447 | CUTA      | 0.004185246 |
| 1448 | FAM102B   | 0.004180684 |
| 1449 | C14orf173 | 0.004115001 |
| 1450 | UBQLN2    | 0.004103036 |
| 1451 | C1orf2    | 0.004099777 |

---

---

|      |           |             |
|------|-----------|-------------|
| 1452 | TRAF7     | 0.004038803 |
| 1453 | ATP1B3    | 0.004033302 |
| 1454 | LAMA1     | 0.003998386 |
| 1455 | SMARCD1   | 0.003939291 |
| 1456 | LCOR      | 0.003892629 |
| 1457 | DIABLO    | 0.003878578 |
| 1458 | PPM1D     | 0.003866138 |
| 1459 | CPSF4     | 0.003846617 |
| 1460 | SGK3      | 0.003697244 |
| 1461 | TOX4      | 0.003690326 |
| 1462 | DHX30     | 0.00363938  |
| 1463 | STARD7    | 0.003615263 |
| 1464 | C3orf37   | 0.003609495 |
| 1465 | TMEM199   | 0.003577232 |
| 1466 | DDX39     | 0.003547998 |
| 1467 | EBAG9     | 0.003517708 |
| 1468 | BTBD11    | 0.003505194 |
| 1469 | NAT5      | 0.003491131 |
| 1470 | SDF4      | 0.00348142  |
| 1471 | DPH2      | 0.003356384 |
| 1472 | MAGED1    | 0.003275892 |
| 1473 | MTPN      | 0.003265035 |
| 1474 | COMMD4    | 0.003242396 |
| 1475 | STAR      | 0.003237361 |
| 1476 | TBCD      | 0.003229147 |
| 1477 | RAB8B     | 0.003127791 |
| 1478 | RPS26L1   | 0.003124002 |
| 1479 | KLHL24    | 0.003021265 |
| 1480 | SCYL2     | 0.002980335 |
| 1481 | MAP3K7IP1 | 0.002916735 |
| 1482 | PTPN7     | 0.002899387 |
| 1483 | ASPSCR1   | 0.00288112  |
| 1484 | DDX42     | 0.002817087 |
| 1485 | UCHL5IP   | 0.002530182 |

---
